# Supplementary material for: Clinical utility of urine specific gravity, electrical conductivity, and color as on‐farm methods for evaluating urine concentration in dairy cattle
Source: PubMed Central journal article supplement — J Vet Intern Med. 2019 Apr 25;33(3):1530–9. doi: 10.1111/jvim.15502 (PMC6524117; doi:10.1111/jvim.15502), 2019-04-25

**FIGURE S1.** Box and whiskers plot of the association between corrected urine specific gravity measured by urine dipstick reagent ( $U_{SG-D}$ ) for a range of urine pH values for 241 urine samples obtained periodically from 20 multiparous periparturient Holstein-Friesian cows. Note that corrected  $U_{SG-D}$  is associated with urine pH to a greater extent than urine osmolality (see Fig. 3). The box and whiskers plot represents the median (middle line), interquartile range (ends of the shaded rectangle), 10 to 90% confidence interval (whiskers), and values outside this confidence interval (small gray circles).

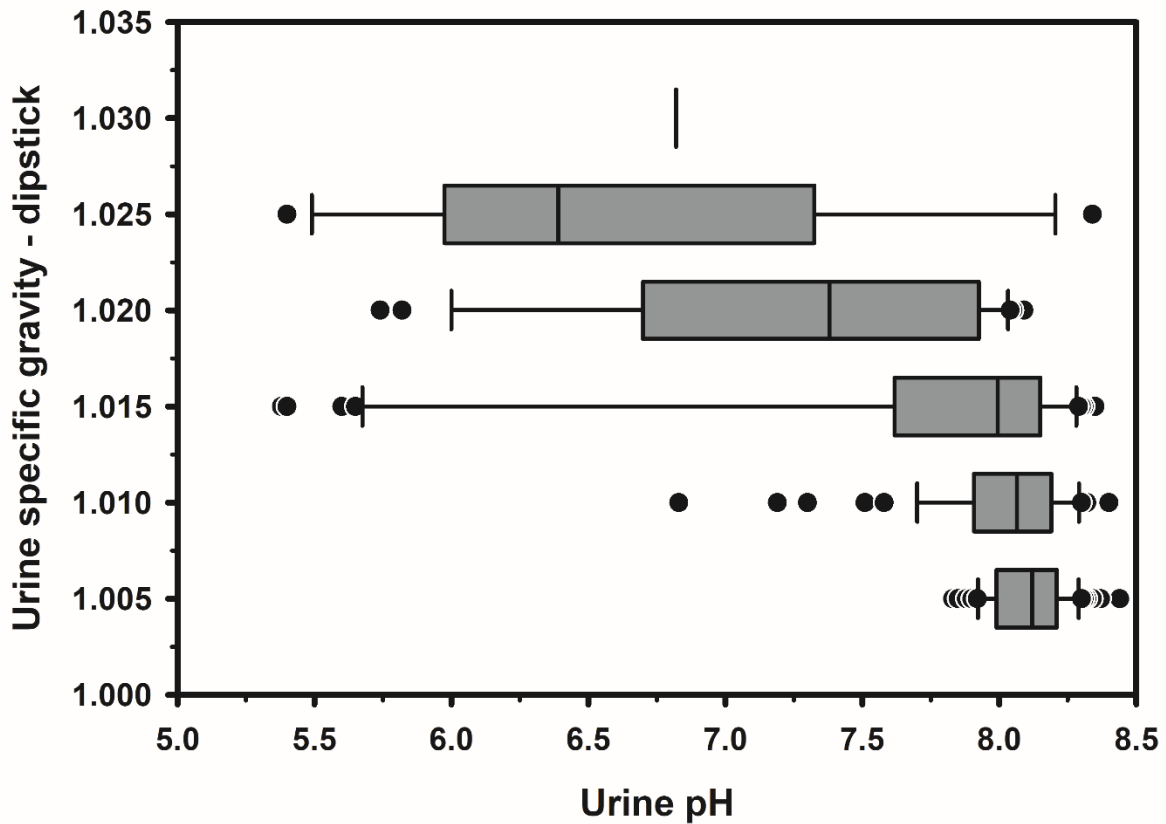

Supplement: JVIM-33-1530-s001.pdf [file JVIM-33-1530-s001.pdf]
